# Supplementary material for: Novel zinc fluorescent probe bearing dansyl and aminoquinoline groupsElectronic supplementary information (ESI) available: NMR spectra and assignment, UV titration details, crystal structure and competitive fluorescent experiments of L. See http://www.rsc.org/suppdata/cc/b2/b202976f/
Source: Royal Society of Chemistry journal article supplement (doi:10.1039/b202976f), 2002-06-05
Supplement: b202976f.doc [file b202976f.doc]

# **Supplementary Material (ESI) for Chemical Communications**

# **This journal is © The Royal Society of Chemistry 2002**

**“Novel Zinc Fluorescent Probe**

**Bearing Dansyl and Aminoquinoline Groups”**

Pengju Jiang, Lizhen Chen, Jun Lin, Qin Liu, Jun Ding,

Xiang Gao and Zijian Guo*

Table of Contents

| 1 | The crystallographic data and the structure of L |
| --- | --- |
| 2 | The experimental details of the 2D 1H NMR spectra and assignment of L and ZnL2 |
| 3 | The Experimental details of UV titration and the calculation method for the dissociation constant |
| 4 | Studies under the presence of competitive metal ions |

1. Crystal structure of **L**

#### **Supplementary Table 1** Crystallographic data for **L**

| Formula | C21H19N3O2S1 | FW | 377.4666 |
| --- | --- | --- | --- |
| Crystal color, habit | Yellowish, block | Crystal system | Monoclinic |
| aÅ  | 8.397 | Space group | P2(1)/c |
| bÅ  | 13.967 | Dimensions(mm) | 0.85 × 0.64 × 0.24 |
| cÅ  | 15.759 | V(Å ) | 1841.61 |
| ° | 90.03 | Z | 5 |
| ° | 94.88 | Radiation, (Å ) | 0.71073 |
| ° | 90.00 | (mm-1) | 0.23 |
| R1 | 0.24 | cald(g/cm3) | 1.625 |
| Rw | 0.56 | Temp(K) | 298 |
| Scan type |  | 2max(degree) | 49.95 |

**Supplementary Fig. 1** Crystal structure of **L**, H atoms are omitted for clarity


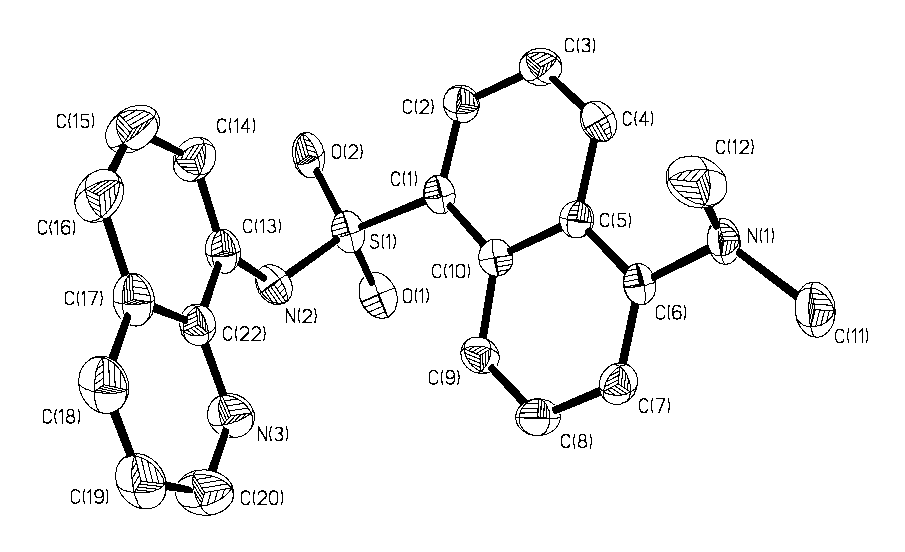


**Supplementary Table 2** Selective bond length (Å) and bond angle (°) of **L**

| **Bond length (Å)** | | **Bond angle (**°**)** | |
| --- | --- | --- | --- |
| **S1-O1** | 1.438(6) | O2-S1-O1 | 120.1(4) |
| **S1-N2** | 1.601(6) | O2-S1-N2 | 109.8(4) |
| **S1-C1** | 1.772(9) | O1-S1-N2 | 103.4(3) |
| **N1- C11** | 1.436(13) | O2-S1-C1 | 105.7(4) |
| **N1-C6** | 1.435(10) | **O1-S1-C1** | 109.2(4) |
| N2-C13 | 1.435(10) | N2-S1-C1 | 108.3(3) |
| N3-C20 | 1.342(12) | C11-N1-C6 | 116.2(7) |
| **N3-C22** | 1.353(11) | C11-N1-C12 | 109.9(8) |
| C1-C2 | 1.370(11) | C6-N1-C12 | 110.7(7) |
| C3-C4 | 1.382(12) | C13-N2-S1 | 127.3(5) |
| C5-C10 | 1.452(10) | C20-N30-C22 | 119.8(9) |
| C5-C6 | 1.443(10) | C2-C1-S1 | 116.0(6) |
| C6-C7 | 1.370(11) | C10-C1-S1 | 121.7(6) |
| C7-C8 | 1.413(12) | C7-C6-N1 | 124.3(7) |
| **C8-C9** | 1.276(12) | N1-C6-C5 | 116.6(6) |
| **C9-C10** | 1.430(11) | C14-C13-N2 | 125.5(7) |
| **C13-C14** | 1.316(12) | N2-C13-C22 | 113.6(7) |
| **C13-C22** | 1.434(11) | N3-C20-C19 | 118.3(11) |
| **C15-C16** | 1.330(14) | N3-C22-C17 | 124.6(7) |
| **C17-C22** | 1.427(12) | N3-C22-C13 | 117.3(7) |
| **C18-C19** | 1.369(16) | C7-C6-C5 | 119.1(7) |
| **C19-C20** | 1.489(16) | **C14-C13-C22** | 120.8(8) |

* The crystal structure was solved and refined by direct methods using Shelx97.

1. H NMR experiments

The NMR spectra were recorded on a Bruker DRX 500 MHz spectrometer in DMSO-d6. The 1H chemical shifts are internally referenced to residue solvent DMSO-d6 peaks. Two-dimensional [1H, 1H]-COSY experiments are carried out using the COSY 45 pulse sequence. Data sets with 1024×128 points are acquired with sweep width of 1250 Hz in both dimensions and 16 scans per t1 increment.

**Supplementary Fig. 2** 2D 1H COSY spectrum of **L** with the assignment of the cross-peaks


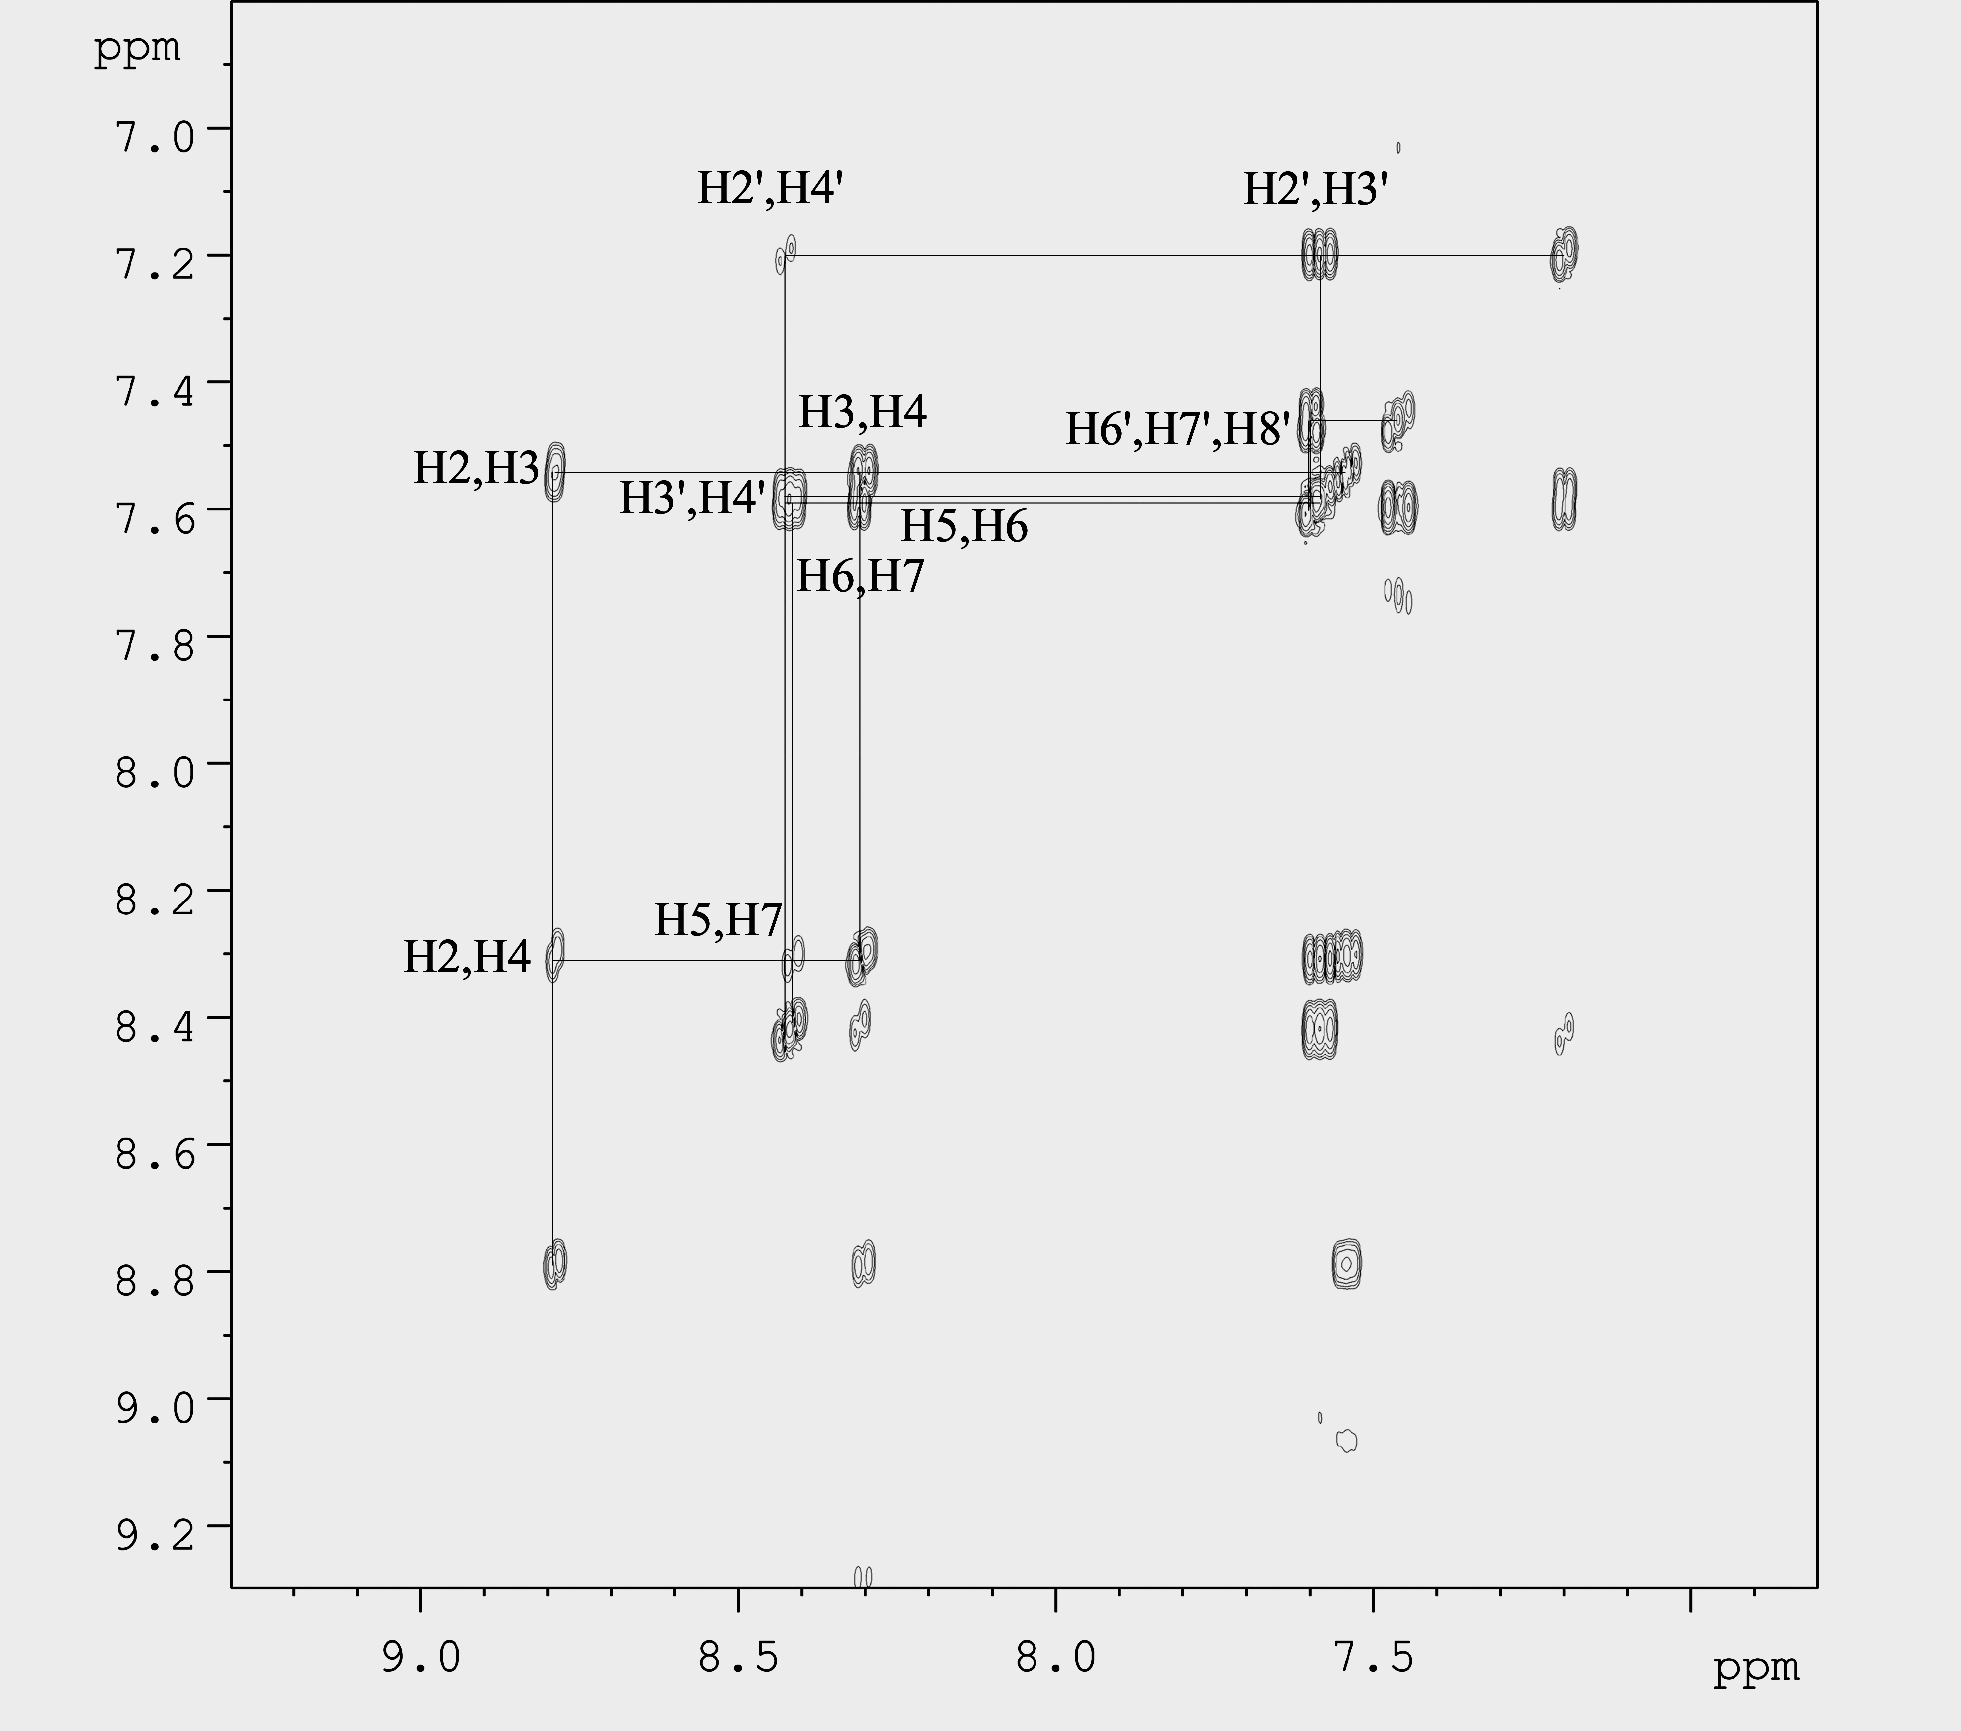


**Supplementary Fig. 3** 2D 1H COSY spectrum of **ZnL2**

with the assignment of the cross-peaks


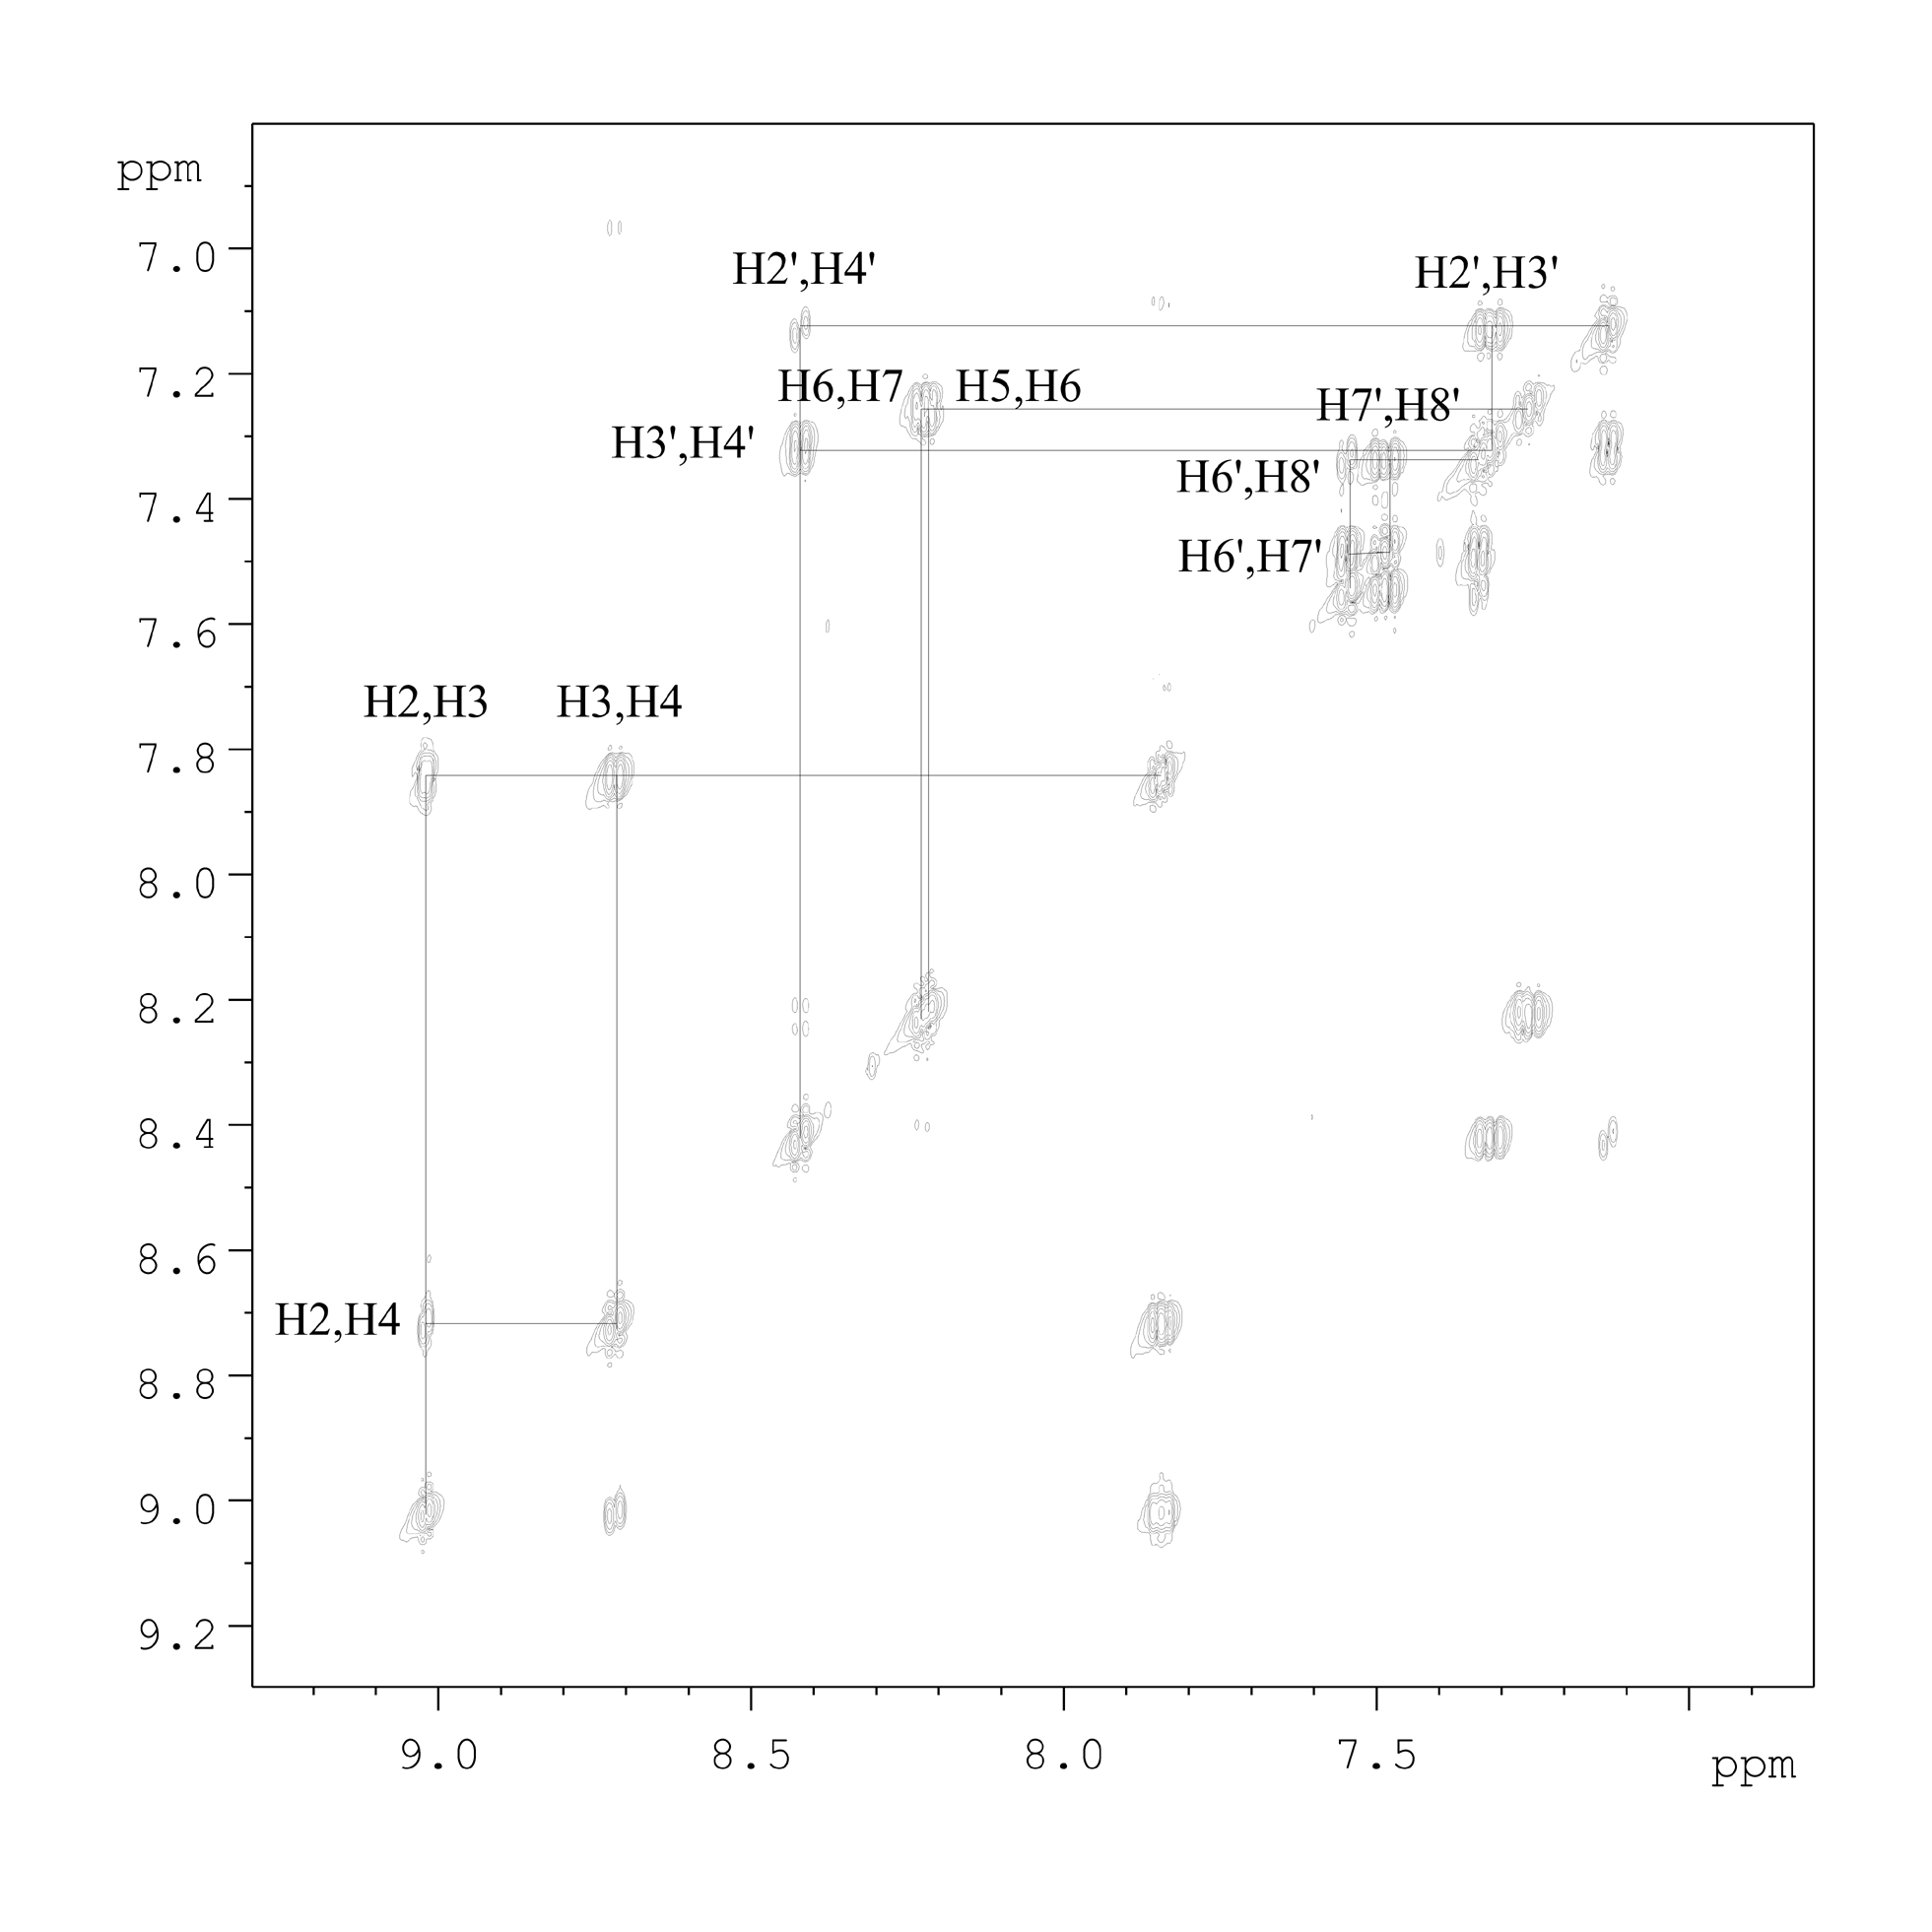


**Supplementary Table 3** The assignment of the 1H resonances and their chemical shifts.

| L | | | ZnL2 | | |
| --- | --- | --- | --- | --- | --- |
| (ppm) | 3J(Hz) | Assign. | (ppm) | 3J(Hz) | Assign. |
| 8.78 | 4.50, (d) | H2 | 9.01 | 5.00, (d) | H2A, B |
| 8.42 | 10.0, (d) | H4’ | 8.71 | 8.50, (d) | H4A, B |
| 8.41 | 8.00, (d) | H7 | 8.41 | 9.00, (d) | H4’A, B |
| 8.31  8.31 | 7.50, (dd) | H4,  H5 | 8.22 | 8.50, (d) | H7A, B |
| 8.21 | 7.50, (d) | H5A, B |
| 7.60  7.60 | 8.00, (dd) | H6’,  H8’ | 7.83 | 4.00, (q) | H3A, B |
| 7.54 | 9.50, (d) | H6’A, B |
| 7.58  7.58 | 8.00, (dt) | H3’,  H6 | 7.50 | 8.00, (t) | H7’A, B |
| 7.33 | 8.00, (d) | H8’A, B |
| 7.54 | 4.00, (q) | H3 | 7.31 | 8.50, (t) | H3’A, B |
| 7.46 | 8.50, (t) | H7’ | 7.25 | 8.00, (t) | H6A, B |
| 7.20 | 8.00, (d) | H2’ | 7.12 | 7.50, (d) | H2’A, B |
| 2.75 | (s) (6H) | H1”,  H2” | 2.77 | (s) (12H) | H1”A, 2”A,  H1”B, 2”B |
| the schematic drawing showing the position of the proton resonances:  **L** **ZnL2** | | | | | |

* Key: d, doublet; t, triplet; q, quadruplet; dd, doublet of doublets; dt, doublet of triplets.

1. UV titration

Although **L** is soluble in water and other common organic solvent, a mixture of 80% DMSO and 20% H2O was employed to mimic the polarity at the *in vivo* conditions. The solution of the ligand was prepared at a concentration of 10-4 mol/L and the stock solution of the metal ion was fixed to 10-3 mol/L in DMSO-H2O. And the titration was carried out by adding 15 l of metal ion solution each time to the solution of the ligand (1 cm sample cell with 3 ml in volume).

The calculation of the binding constant was according to the following equations:

c is concentration; b stands the width of the sample cell; and  represents the absorption coefficient.

1. **Studies under the presence of competitive metal ions**

The florescent spectra were acquired at 395 nm excitation and 469 nm emissions. The details are listed in Supplementary Table 4.

**Supplementary Table 4** Relative florescence intensity of **L** and with competitive ions

| Solution | Relative fluorescence intensity |
| --- | --- |
| L | 1.00 |
| **L** + K+, Na+, Mg2+, Ca2+ | 1.62 |
| **L** + Zn2+ + K+, Na+, Mg2+, Ca2+ | 23.5 |

The concentrations of **L** and the metal ions are as follows: L, 10-5 M; and K+, Na+ 100 mM; Mg2+, Ca2+, 5 mM; Zn2+, 5M. These concentrations were used to mimic the in vivo conditions.

As can be seen from the results, the selectivity of the probe towards Zn(II) ion is over 14 times higher than to other metal ions.

_

End
